# Supplementary material for: Nitrogen-doped arch and hollow shaped nanocarbons for CO2adsorption
Source: Royal Society of Chemistry journal article supplement (doi:10.1039/c4ra09200g), 2014-01-01
Supplement: c4ra09200g1.pdf [file c4ra09200g1.pdf]

† **Electronic Supplementary Information (ESI)**

**Nitrogen-doped arch and hollow shaped nanocarbons  
for CO<sub>2</sub> adsorption.**

Prakash Ramakrishnan, Sangaraju Shanmugam\*

\* Department of Energy Systems Engineering, Daegu Gyeongbuk Institute of Science & Technology (DGIST), 50<sup>1</sup> Sang-Ri, Hyeongpung-Myeon, Dalseong-gun, Daegu, 711-873, Republic of Korea.

Tel.: +82-53-785-6413. Fax: +82-53-785-6409.

E-Mail address: sangarajus@dgist.ac.kr

**Experimental section**

In a typical experiment, the nitrogen doped porous carbon nanostructures were prepared by following three simple steps: (1) Fabrication of core-shell fibrous membrane by coaxial electro spinneret with different flow rates, (2) Leaching out of core material through a simple hot water dipping and sonication process, (3) Stabilization and carbonization of leached fibrous membrane under air and argon atmosphere at different temperatures.

*Fabrication of N-doped porous HCNR:* The N-doped porous hollow carbon nanorods were prepared by co-axial electrospinning approach, prior to the experiment, PAN (M<sub>w</sub>= 150,000 g mol<sup>-1</sup>) of 10 wt% and PVP (M<sub>w</sub>= 1,300,000 g mol<sup>-1</sup>) of 20 wt% were added in 10 ml of *N,N*-dimethylformamide (DMF) separately and stirred at 80 °C, until a clear homogenous solution was obtained. The prepared two different homogeneous polymers were loaded into co-axial electrospinning syringes; PAN polymer solution in a pump1 syringe (P1, needle orifice of 0.86mm) which acts as a shell material or N source precursor and a PVP polymer solution in a pump2 syringe (P2, needle orifice of 0.26 mm) play as a core material or sacrificial material in this study. The following electrospinning parameters were adopted: the flow rate of P1 was kept at 0.1 ml h<sup>-1</sup>, flow rate for P2 was kept at 0.5 ml h<sup>-1</sup>, distance between the aluminum wrapped collector drum and the coaxial needle was set at 15 cm, a collector drum rotating speed of 300 rpm and a high voltage power supply of 13.5 kV under humidity < 30 % RH.

The as prepared electrospun membrane was cut into small pieces (2 x 2cm) and dipped in hot water at 75 °C for 12 h. Hot water was replaced every 3 h followed by sonication for 15 min and dried in oven for 10 min at 70 °C. The leached out membrane was stabilized at 250 °C for 2 h at a heating rate of 2 °Cmin<sup>-1</sup> under air atmosphere and followed by carbonization under argon atmosphere at 800 °C for 1h at a heating rate of 5 °C min<sup>-1</sup>. The carbonized product yield was found to be ~32%. The obtained product was ground using a mortar and pestle and labeled as HCNR.

*Fabrication of N-doped porous ACNR:* The N-doped arch shaped structure was prepared by following the same procedure of HCNR except that the flow rates of P1 and P2 was changed to 5 ml h<sup>-1</sup> and 1 ml h<sup>-1</sup>, respectively, thereby preparing arch shaped morphology and named as ACNR.

*Fabrication of N-doped CNR comparison studies:* For comparison, well known N-doped carbon nanorod structure was prepared by conventional electrospinning approach using a PAN solution of 10 wt% and followed by stabilization and carbonization with the temperature same as HCNR and ACNR. The obtained carbonized product of 36 % was ground using mortar and pestle and labeled as CNR.

*Characterizations:* The morphology was observed with field emission scanning electron microscope (S4800 FE-SEM) and field emission transmission electron microscope (HF 3600 FE-TEM). The phase and structure were carried out using high resolution X-ray diffraction (HR-XRD). The quantitative elemental analyses were measured using elemental analyzer (EA, Vario MICRI cube) and X-ray photo-electron spectroscope (XPS, Thermo scientific ESCALAB 250Xi). The surface area, microporous information, the microporous (0.5-2 nm) and mesoporous (2-50 nm) pore size distribution were determined by N<sub>2</sub> adsorption–desorption measurements (Micromeritics, ASAP 2020 at 77 K) using Bruner–Emmett–Teller (BET), the t-plot method (Harkins and Jura formula) and non-local density functional theory (NLDFT), respectively. In prior to measurements, the samples were degassed at 180 °C under vacuum overnight. The CO<sub>2</sub> adsorption isotherm measurement also done using Micromeritics ASAP 2020 at 273, 293, 298 and 303 K and before measurement all the samples were degassed at 180 °C under vacuum for 8h. The measurements under different temperatures and gases were taken consecutively without degassing. Circulating bath was provided to control the temperatures.

**The formulae used for calculation:-**

The isosteric heat of adsorption was calculated according to Clausius-Clapeyron equation:

$$Q_{st} = RT^2(\partial \ln P / \partial T)_q$$

Where  $P$  is pressure,  $T$  is temperature,  $q$  is the amount adsorbed,  $R$  is the gas constant, and  $Q_{st}$  denotes the heat of adsorption.

The selectivity ( $S$ ) for adsorption of  $\text{CO}_2$  over  $\text{N}_2$  was calculated from the ratio of the adsorbed amount of  $\text{CO}_2$  at 0.15 bar to the adsorbed amount of  $\text{N}_2$  at 0.75 bar at constant temperature; the value is normalized for the pressures chosen, according to equation:

$$S = (q_{\text{CO}_2} / q_{\text{N}_2}) / (p_{\text{CO}_2} / p_{\text{N}_2})$$

where  $q$  is the amount adsorbed and  $P$  is pressure.

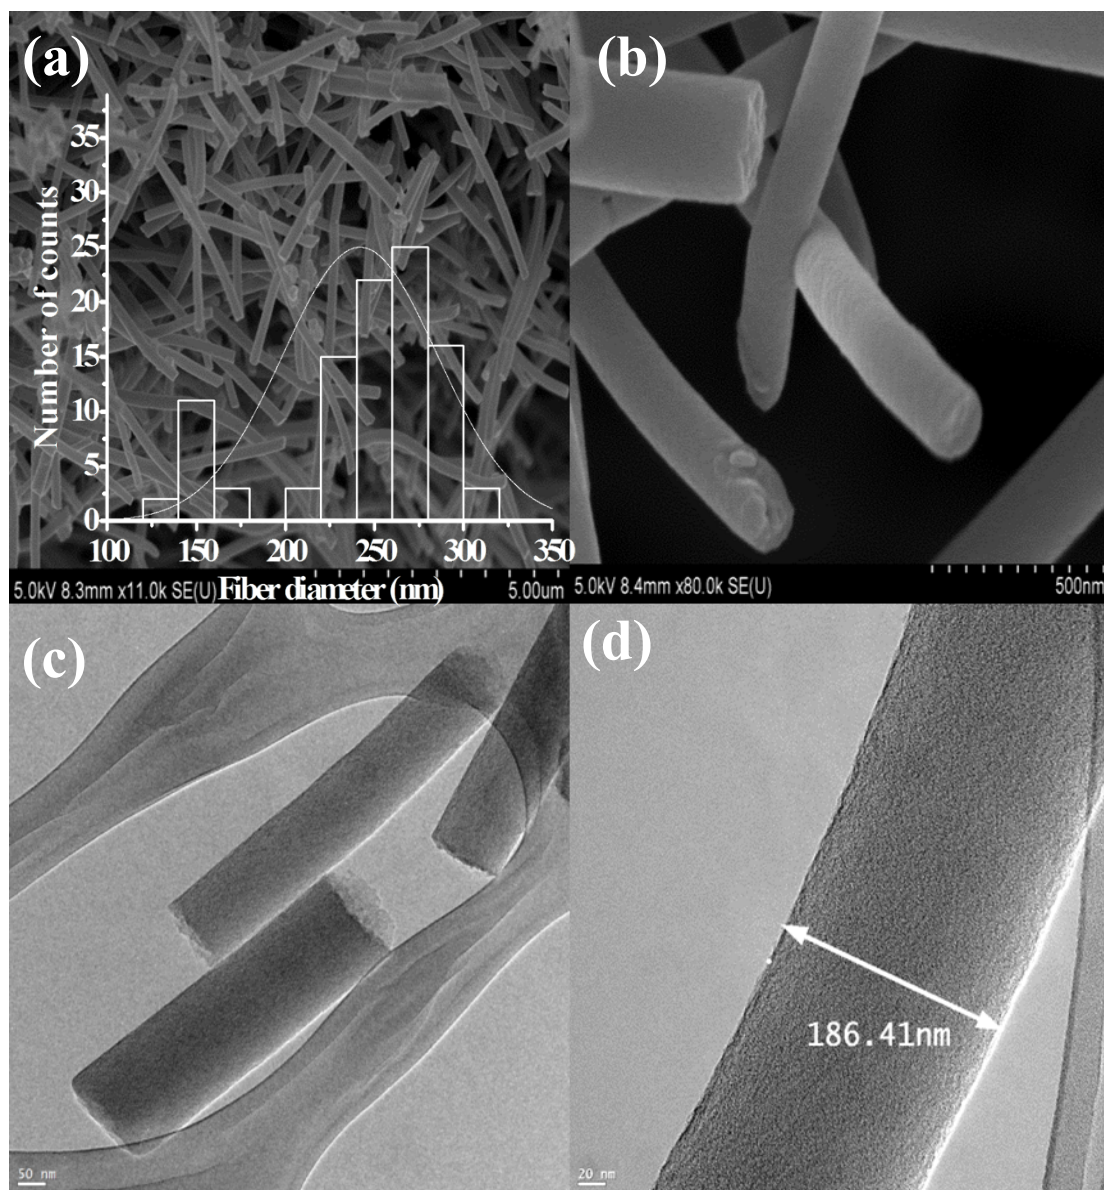

**Fig.S1** (a, b) FE-SEM and (c, d) FE-TEM images of CNR sample.

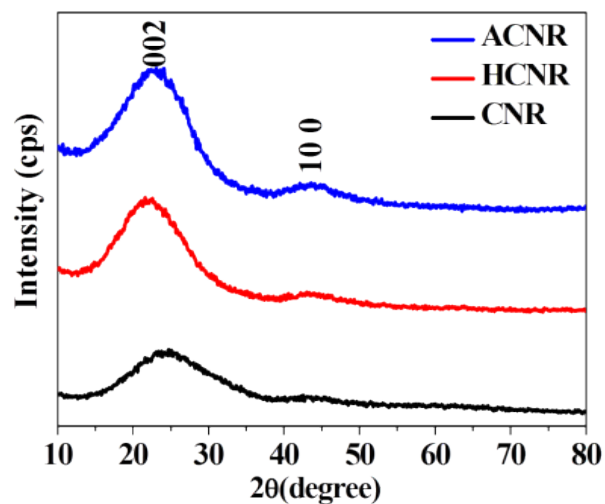

**Fig. S2** XRD of CNR, HCNR and ACNR samples, respectively.

The XRD patterns of CNR, HCNR and ACNR exhibits similar features as shown in Figure S4a. The broad peaks observed at around  $2\theta = 24^\circ$  and  $44^\circ$  are hexagonal graphitic carbon with (002) and (100) lattice planes, respectively. However, the broad graphite peaks observed in (002) and (100) represent the existence of N atoms in the carbon lattice which results partially amorphous in nature.<sup>1</sup> Particularly, a (002) plane widens due to the presence of N and fading of a lattice plane (1 0 0) attributed to the increase in N content, which clearly shows the existence of graphitic and turbostatic hybrid structures of carbon in all the samples.<sup>2</sup>

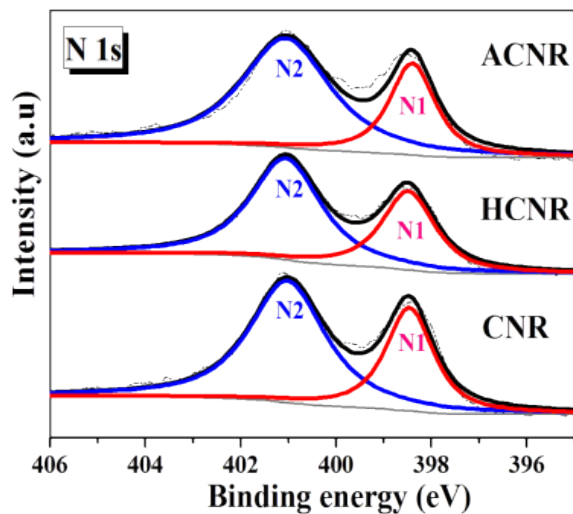

**Fig. S3** High resolution N1s XPS spectra of CNR, HCNR and ACNR samples, respectively.

The deconvoluted N 1s spectra (Fig. S3) of all the samples show pyridinic-N at N1 ( $398.4 \pm 0.1$  eV) and quaternary-N at N2 ( $401.0 \pm 0.1$  eV) (Table S1).<sup>3</sup> Moreover, these peaks are only symmetric without broadness and tail inference. So the possibility of other N-species are disregarded.

| <b>Table S1.</b> XPS deconvoluted values of N <sub>1s</sub> for all samples |                               |                               |
|-----------------------------------------------------------------------------|-------------------------------|-------------------------------|
| <b>Samples</b>                                                              | <b>N<sub>1s</sub></b>         |                               |
|                                                                             | <b>N<sub>1</sub><br/>(eV)</b> | <b>N<sub>2</sub><br/>(eV)</b> |
| CNR                                                                         | 398.4                         | 401.0                         |
| HCNR                                                                        | 398.5                         | 401.1                         |
| ACNR                                                                        | 398.4                         | 401.1                         |

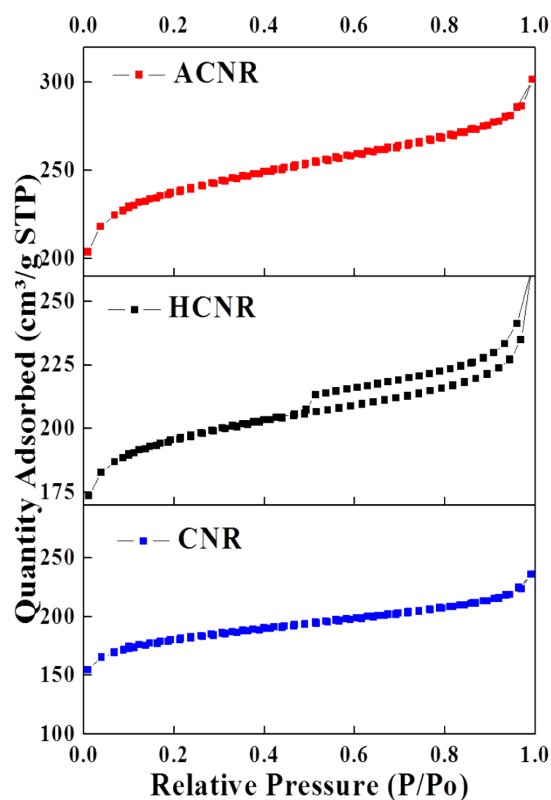

**Fig. S4** BET adsorption and desorption plots of all the samples.

The isotherms obtained for CNR and ACNR sample shows type I; HCNR sample displays both type I and type IV isotherm, as shown in Fig. S4. The differences in isotherm are due to differences in morphologies; especially the HCNR exhibits hysteresis isotherm from the partial pressure region of 0.45 to 1.0 due to presence of mesopore range (< 50nm) hollow structure; besides, the condensation of N<sub>2</sub> gas at high partial pressure region at 1.0 P/P<sub>0</sub> was due to the presence of macropores >50 nm as observed in FE-SEM and HR-TEM images in Fig. 1.

**Table S2.** Structural/textural properties of all samples determined using BET, T-plot and NI-DFT methods.

| <b>Samples</b> | <b>S<sub>BET</sub><sup>a</sup></b><br><b>(m<sup>2</sup>.g<sup>-1</sup>)</b> | <b>S<sub>t-plot</sub><sup>b</sup></b><br><b>(m<sup>2</sup>.g<sup>-1</sup>)</b> | <b>A<sub>Micro</sub><sup>c</sup></b><br><b>(%)</b> | <b>V<sub>micro</sub><sup>d</sup></b><br><b>(cm<sup>3</sup>.g<sup>-1</sup>)</b> | <b>V<sub>total</sub><sup>e</sup></b><br><b>(cm<sup>3</sup>.g<sup>-1</sup>)</b> | <b>P<sub>micro</sub><sup>f</sup></b><br><b>(nm)</b> |
|----------------|-----------------------------------------------------------------------------|--------------------------------------------------------------------------------|----------------------------------------------------|--------------------------------------------------------------------------------|--------------------------------------------------------------------------------|-----------------------------------------------------|
| <b>CNR</b>     | 484.1 ± 09                                                                  | 333.9                                                                          | 69.41                                              | 0.2125                                                                         | 0.4803                                                                         | 1.590                                               |
| <b>HCNR</b>    | 556.9 ± 11                                                                  | 416.7                                                                          | 74.82                                              | 0.2415                                                                         | 0.5681                                                                         | 1.591                                               |
| <b>ACNR</b>    | 619.3 ± 11                                                                  | 432.4                                                                          | 69.82                                              | 0.2852                                                                         | 0.6589                                                                         | 1.590                                               |

<sup>a</sup>S<sub>BET</sub> : Specific surface area determined by BET method for P/P<sub>0</sub>= 0.05 to 0.12.

<sup>b</sup>S<sub>t-plot-internal</sub> : Microporous surface area determined by t-plot method using Harkins and Jura thickness equation.

<sup>c</sup>A<sub>Micro</sub> : Percent of pore surface area contributed by micropores

<sup>d</sup>V<sub>micro</sub> : Micropore volume was calculated using the t-plot method.

<sup>e</sup>V<sub>total</sub> <sup>f</sup>P<sub>micro</sub> : Total pore volume and width of the pore calculated using the NL-DFT.



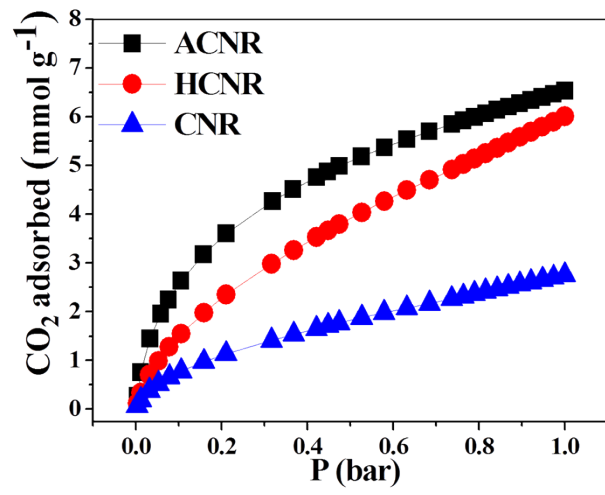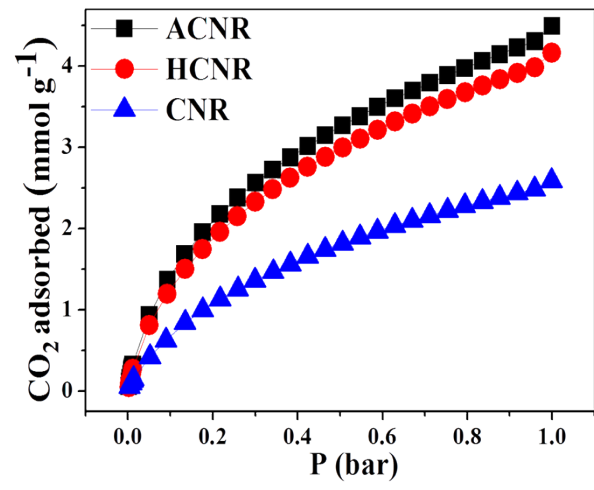

**Fig. S5.** CO<sub>2</sub> adsorption at 273 K (a), 293 K(b), 303 K (c) and Isosteric heat of CO<sub>2</sub> adsorption (d) calculated at 273, 293, 298 and 303 K for all samples CNR, HCNR and ACNR samples.

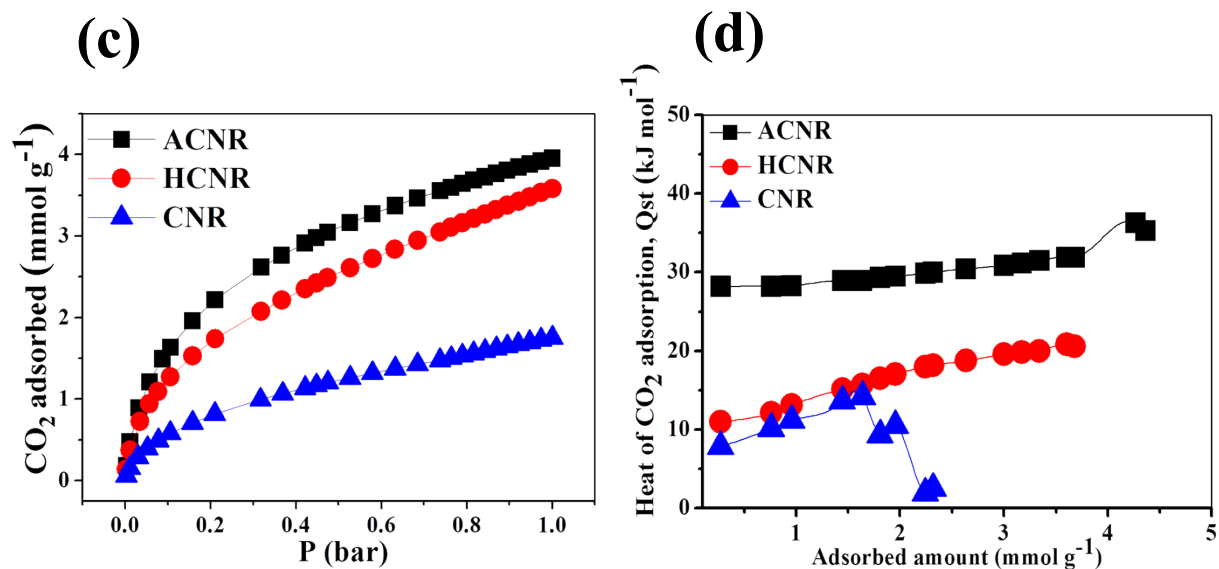

In Fig. S5d, the ACNR, HCNR and CNR sample follows differ heat of CO<sub>2</sub> gas adsorption due to the differences in textural properties such as BET surface area, T-plot microporous area, and pore volume (Table S2). Also, ACNR and HCNR shows' no saturation level in CO<sub>2</sub> adsorption as well as in heat of adsorption studies, which clearly conveys both of them are potentially suitable for CO<sub>2</sub> adsorption at elevated pressure.

**Table S3.** Comparison of previous reports on N-doped carbon materials in CO<sub>2</sub> adsorption studies.

| <b>Adsorbents<br/>(N-doped/N-free carbon<br/>materials)</b> | <b>N<br/>(wt%)</b> | <b>Surface<br/>area<br/>(m<sup>2</sup> g<sup>-1</sup>)</b> | <b>CO<sub>2</sub><br/>adsorption,<br/>1 bar at 298<br/>K<br/>(mmol g<sup>-1</sup>)</b> | <b>Ref.</b>  |
|-------------------------------------------------------------|--------------------|------------------------------------------------------------|----------------------------------------------------------------------------------------|--------------|
| N-carbon molecular sieves                                   | 5.4                | 349                                                        | 2.7                                                                                    | 4            |
| N- porous carbon                                            | 2.7                | 2747                                                       | 3.9                                                                                    | 5            |
| N-hollow carbon                                             | 14.8               | 767                                                        | 2.67                                                                                   | 6            |
| N-porous carbon                                             | 6.73               | 1979                                                       | 4.3                                                                                    | 7            |
| N-microporous carbon                                        | 5.58               | 263                                                        | 1.95                                                                                   | 8            |
| N-KOH activated<br>PPy carbon                               | 10.1               | 1700                                                       | 3.90                                                                                   | 9            |
| N-porous carbon                                             | 4.8                | 1360                                                       | 4.3                                                                                    | 10           |
| N-porous carbon monolithic                                  | 1.92               | 467                                                        | 3.13                                                                                   | 11           |
| N-activated carbon                                          | 2.22               | 2596                                                       | 3.75                                                                                   | 12           |
| Microporous carbon                                          | Nil                | 808                                                        | 3.8                                                                                    | 13           |
| Monolithic porous carbon                                    | Nil                | 1935                                                       | 4.2                                                                                    | 14           |
| Ultra-micro porous carbon                                   | Nil                | 1220                                                       | 3.97                                                                                   | 15           |
| Carbon aerogels                                             | Nil                | 1100                                                       | <b>2.2</b>                                                                             | 16           |
| N-HCNR                                                      | 8.22               | ~556                                                       | <b>3.75</b>                                                                            | This<br>work |

---

|        |      |      |             |              |
|--------|------|------|-------------|--------------|
| N-ACNR | 8.70 | ~619 | <b>4.23</b> | This<br>work |
|--------|------|------|-------------|--------------|

---

**Supporting information references:**

1. H. Chen, F. Sun, J. Wang, W. Li, W. Qiao, L. Ling, and D. Long, *J. Phys. Chem. C*, 2013, **117**, 8318–28.

2. N. Iwashita, C. R. Park, H. Fujimoto, M. Shiraishi, and M. Inagaki, *Carbon*, 2004, **42**, 701–714.
3. S. R. Kelemen, M. L. Gorbaty, and P. J. Kwiatek, *Energy & Fuels*, 1994, **8**, 896–906.
4. J. Patiño, M. C. Gutiérrez, D. Carriazo, C. O. Ania, J. L. G. Fierro, M. L. Ferrer, and F. del Monte, *J. Mater. Chem. A*, 2014, **2**, 8719-29.
5. A. Aijaz, N. Fujiwara, and Q. Xu, *J. Am. Chem. Soc.*, 2014, **136**, 6790–3.
6. S. Feng, W. Li, Q. Shi, Y. Li, J. Chen, Y. Ling, A. M. Asiri, and D. Zhao, *Chem. Commun.*, 2014, **50**, 329–31.
7. X. Ma, M. Cao, and C. Hu, *J. Mater. Chem. A*, 2013, **1**, 913-8.
8. J. Wang, I. Senkovska, M. Oschatz, M. R. Lohe, L. Borchardt, A. Heerwig, Q. Liu, and S. Kaskel, *ACS Appl. Mater. Interfaces*, 2013, **5**, 3160–7.
9. M. Sevilla, P. Valle-Vigón, and A. B. Fuertes, *Adv. Funct. Mater.*, 2011, **21**, 2781–7.
10. V. Chandra, S. U. Yu, S. H. Kim, Y. S. Yoon, D. Y. Kim, A. H. Kwon, M. Meyyappan, and K. S. Kim, *Chem. Commun.*, 2012, **48**, 735–7.
11. G.-P. Hao, W.-C. Li, D. Qian, and A.-H. Lu, *Adv. Mater.*, 2010, **22**, 853–7.
12. Z. Zhang, M. Xu, H. Wang, and Z. Li, *Chem. Eng. J.*, 2010, **160**, 571–7.
13. D. Qian, C. Lei, E.-M. Wang, W.-C. Li, and A.-H. Lu, *ChemSusChem*, 2014, **7**, 291–8.
14. L. Estevez, R. Dua, N. Bhandari, A. Ramanujapuram, P. Wang, and E. P. Giannelis, *Energy Environ. Sci.*, 2013, **6**, 1785-90.
15. J. Cai, J. Qi, C. Yang, and X. Zhao, *ACS Appl. Mater. Interfaces*, 2014, **6**, 3703–11.
16. E. Masika and R. Mokaya, *RSC Adv.*, 2013, **3**, 17677-81.
